# Supplementary material for: Effects of Quercitrin on PRV-Induced Secretion of Reactive Oxygen Species and Prediction of lncRNA Regulatory Targets in 3D4/2 Cells
Source: MDPI journal article supplement (doi:10.3390/antiox11040631), 2022-03-25
Supplement: s1 [file s1]

Supplementary Table S1 Output statistics of the sequencing reads for each sample.

| Sample | Raw reads | Clean reads | Clean bases(G) | Error rate(%) | Q20(%) | Q30(%) | GC(%) |
|--------|-----------|-------------|----------------|---------------|--------|--------|-------|
| C1     | 78545122  | 78347416    | 10.9           | 0.2           | 97.52  | 93.05  | 45.52 |
| C2     | 75705446  | 75532868    | 10.51          | 0.19          | 97.73  | 93.58  | 45.56 |
| C3     | 81726938  | 81504264    | 11.34          | 0.24          | 97.35  | 92.77  | 45.42 |
| P1     | 76628834  | 76379484    | 10.62          | 0.28          | 97.24  | 92.57  | 46.36 |
| P2     | 81128982  | 80933782    | 11.24          | 0.22          | 97.8   | 93.80  | 46.53 |
| P3     | 75737372  | 75535648    | 10.51          | 0.23          | 97.62  | 93.34  | 46.59 |
| P+Q1   | 81143544  | 80901170    | 11.27          | 0.26          | 97.43  | 92.98  | 46.24 |
| P+Q2   | 85956418  | 85723402    | 11.93          | 0.24          | 97.62  | 93.37  | 45.99 |
| P+Q3   | 98378380  | 98107478    | 13.66          | 0.25          | 97.51  | 93.13  | 46.00 |

Supplementary Table S2 The 14 mRNA differentially expressed among the three groups

| Genbank#           | Accession number | Symbol   |
|--------------------|------------------|----------|
| ENSSSCG00000004751 | 100621371        | CHP1     |
| ENSSSCG00000006580 | HGNC:10492       | S100A2   |
| ENSSSCG00000009560 | 100621036        | TFDP1    |
| ENSSSCG00000011264 | 100519275        | CSRNP1   |
| ENSSSCG00000013433 | 100512586        | ADAMTSL5 |
| ENSSSCG00000013457 | 100738665        | DOT1L    |
| ENSSSCG00000014335 | 100520367        | REEP2    |
| ENSSSCG00000016438 | 100517250        | NUB1     |
| ENSSSCG00000016991 | 100522469        | DUSP1    |
| ENSSSCG00000021569 | 100626072        | MMP25    |
| ENSSSCG00000030209 | 102161832        | MFNG     |
| ENSSSCG00000031262 | 733688           | TXNIP    |
| ENSSSCG00000031342 | 110261334        | -        |
| ENSSSCG00000033126 | 110257088        | FAM168B  |
